# Supplementary material for: Spectrum of mutational signatures in T-cell lymphoma reveals a key role for UV radiation in cutaneous T-cell lymphoma
Source: PubMed Central journal article supplement (PMC7889847; doi:10.1038/s41598-021-83352-4), 2021-02-17
Supplement: 41598_2021_83352_MOESM2_ESM.pdf [file 41598_2021_83352_MOESM2_ESM.pdf]

# **Spectrum of mutational signatures in T-cell lymphoma reveals a key role for UV radiation in cutaneous T-cell lymphoma**

**Christine L Jones<sup>1</sup>, Andrea Degasperi<sup>2,3</sup>, Vieri Grandi<sup>1</sup>, Tauanne D Amarante<sup>2,3</sup>, Genomics England Research Consortium<sup>4</sup>, Tracey J Mitchell<sup>1</sup>, Serena Nik-Zainal<sup>2,3</sup> and Sean J Whittaker<sup>1\*</sup>**

<sup>1</sup> St. John's Institute of Dermatology, School of Basic and Medical Biosciences, King's College London, Guy's Hospital, London, SE1 9RT, United Kingdom.

<sup>2</sup> MRC Cancer Unit, University of Cambridge, Hutchison/MRC Research Centre, Box 197, Cambridge Biomedical Campus, Cambridge, United Kingdom CB2 0XZ

<sup>3</sup> Academic Laboratory of Medical Genetics, Box 238, Lv 6 Addenbrooke's Treatment Centre, Addenbrooke's Hospital, Cambridge, CB2 0QQ

<sup>4</sup> Full list of Genomics England Research Consortium members provided in manuscript.

## **Supplementary Methods**

### **Mutation calling from single cell RNA-seq data**

Data processing was performed as outlined in the GATK best practices for calling variants in RNA-seq. SRA toolkit (<http://ncbi.github.io/sra-tools/>) was used to fetch fastq files for all T<sub>EM</sub> and T<sub>CM</sub> cells from donor 6, 12 and 16. 2-pass STAR<sup>1</sup> alignment was performed using the hg38 assembly and GENCODE v29 known genes annotation to build the genome index. Picard tools (<http://broadinstitute.github.io/picard/>) was then used to add read group information, sort, mark duplicates and index the BAM file. GATK<sup>2</sup> Split'n'trim was used to remove intronic overhangs followed by base recalibration. Finally, GATK

HaplotypeCaller was used to identify potential variants followed by GATK VariantFiltration to flag variants in a SNP cluster (-window 35 -cluster 3) and those with a Fisher strand value greater than 30 or quality by depth value of less than 2.

The VariantAnnotation<sup>3</sup> package was used to import vcf files into R<sup>4</sup> for further manipulation. Variants were restricted to SNVs which passed all filters applied by VariantFiltration. Variants were further restricted to those with a read depth of at least 6 as this has been shown to give a true positive rate of 68% for variant calling from RNA-seq data<sup>5</sup>. To exclude germline mutations, we excluded any variant which occurred in three or more cells from the same patient. Since the coverage of some genes was rather sparse, we included variants in the final analysis only if the reference allele was correctly called in at least 9 other cells from that patient. Finally, the mutation context of each variant was annotated using the SomaticSignatures<sup>6</sup> package and mutational profiles were examined for presence of the UV Signature 7 by visual inspection looking for a prevalent C>T in a TCC context peak.

## Supplementary Tables

Data in Supplementary1\_2020\_06\_24.xls

**Supplementary Table 1:** Number of mutations contributed by each signature to an individual's total exome SNV count. ND = Signature not included in the analysis as it was not present in the subtype analysis. NSA = No signatures assigned, either because there were too few mutations to clearly assign signatures or because the cosine similarity between model and data was poor (<0.6).

|  | Disease | Tumour cell selection | Germline cell selection | Exon capture | Average coverage/depth | Variant caller | Variant calling criteria |
|--|---------|-----------------------|-------------------------|--------------|------------------------|----------------|--------------------------|
|--|---------|-----------------------|-------------------------|--------------|------------------------|----------------|--------------------------|

|                       |                      |                                                                                                                    |                                                             |                                         |                                                             |                                   |                                                                                                                                                                             |
|-----------------------|----------------------|--------------------------------------------------------------------------------------------------------------------|-------------------------------------------------------------|-----------------------------------------|-------------------------------------------------------------|-----------------------------------|-----------------------------------------------------------------------------------------------------------------------------------------------------------------------------|
| Choi 2015             | SS                   | CD3+TCRV $\beta$ +CD14-CD8-CD19- from peripheral blood if clonal TCRVB detected, otherwise CD3+CD26-CD14-CD8-CD19- | CD14+CD3-CD8-CD19- monocytes                                | NimbleGen 2.1 Exome reagent             | All >140x<br>Median 220x/184x (tumour/normal)               | Not specified                     | P-value significance threshold determined independently for each tumour                                                                                                     |
| da Silva Almeida 2015 | MF/SS                | Skin biopsies and/or CD4+ T-cells from peripheral blood with TCR clonal rearrangement                              | buccal swabs or granulocytes                                | SureSelect Human All Exon 50 MB kit     | 143.51x with 95.3% of the target sequence covered by >30x   | SAVI                              | $\geq 15\%$ of tumour reads and absent in germline sample                                                                                                                   |
| Jiang 2015            | NKTCL                | Frozen tumour tissue                                                                                               | peripheral blood                                            | SureSelect Human All Exon 50 MB kit     | 134.9x with 90.9% of the target sequence covered $\geq 10x$ | GATK Unified Genotyper and muTect | Not specified, excluded those reported in matched control, those with low depth, and those described in dbSNP135                                                            |
| Kataoka 2015          | ATLL                 | Peripheral blood, lymph node or other tumour tissue                                                                | buccal swabs                                                | SureSelect Human All Exon v4 or v5 kits | 113x in tumour, 108x in matched normal                      | In-house pipeline                 | (i) Fisher's exact $P \leq 0.01$ ; (ii) $\geq 5$ variant reads in tumor samples; (iii) VAF in tumor samples $\geq 0.07$ ; and (iv) a VAF in matched normal samples $< 0.07$ |
| McKinney 2017         | HSTL                 | FFPE tumour tissues                                                                                                | unaffected bone marrow                                      | SureSelect Human All Exon 50MB kit      | 80x                                                         | MuTect version 1.1.7              | tumor LOD score cutoff 4.5                                                                                                                                                  |
| Moffitt 2017          | EATL                 | FFPE tumour tissues                                                                                                | unaffected bone marrow                                      | SureSelect Human All Exon 50 MB kit     | 70x                                                         | MuTect version 1.1.7              | tumor LOD score cutoff 4.5                                                                                                                                                  |
| Palomero 2014         | AITL/EATL/NKTCL/PTCL | Tumour biopsy material                                                                                             | blood, buccal swab or non-tumor infiltrated biopsy material | SureSelect Human All Exon 50 MB kit     | 45x with 84% of the target sequence covered $\geq 10x$      | SAVI                              | $> 15\%$ of tumour reads and $< 3\%$ in germline sample                                                                                                                     |
| Prasad 2016           | SS                   | CD4+ T-cells from peripheral blood with TCR clonal rearrangement                                                   | granulocytes                                                | Nextera rapid capture exome (37 Mb)     | 37x                                                         | MuTect                            | MuTect standard recommendation                                                                                                                                              |

|                        |           |                                                                               |                                                                                                  |                                                         |                                                                       |                                              |                                                                                                                                |
|------------------------|-----------|-------------------------------------------------------------------------------|--------------------------------------------------------------------------------------------------|---------------------------------------------------------|-----------------------------------------------------------------------|----------------------------------------------|--------------------------------------------------------------------------------------------------------------------------------|
| Roberti 2016           | EATL      | Microdissected FFPE intestinal tissue - area with highest tumour cell content | Microdissected FFPE intestinal tissue -area devoid of neoplastic cells                           | SureSelect                                              | 195x/213x (tumour/normal) ~ 89% of target sequence covered $\geq 50x$ | samtools mpileup (v1.2) and VarScan (v2.3.7) | >22% of tumour reads and < 15% of normal with difference between tumour and normal <22%                                        |
| Sakata-Yanagimoto 2014 | AITL/PTCL | Tumour biopsy material                                                        | buccal mucosa, bone marrow MNCs without apparent lymphoma infiltration or peripheral blood cells | SureSelect Human All Exon 50Mb or V4 kit                | 86.5% was analyzed by $\geq 20$ independent reads on average          | samtools                                     | P < 0.01, observed in bidirectional reads and allele frequency < 0.1 in the germline                                           |
| Ungewickell 2015       | MF/SS     | Skin biopsies and/or CD4+ clonal Vbeta sorted T-cells from peripheral blood   | CD4-/Vbeta- PBMCs                                                                                | EZexome V2.0 Early Access for Capture by Ambry Genetics | Not specified                                                         | GATK SeqGene and VarScan                     | Default parameters, VAF > 0.1 and supported by bidirectional reads.                                                            |
| Wang 2015              | SS        | CD4+ T-cells from peripheral blood with TCR clonal rearrangement              | fibroblasts                                                                                      | HGSC VCRome 2.1                                         | 100x with ~94% of the target sequence covered $\geq 20$               | Atlas-SNP2                                   | tumour VAF $\geq 0.04$ ; normal VAF: tumour VAF $\leq 0.15$                                                                    |
| Woollard 2016          | SS        | CD4+ T-cells from peripheral blood with TCR clonal rearrangement              | fibroblasts                                                                                      | Not specified                                           | 82% of the target region covered >20x                                 | VarScan                                      | Varscan default parameters, VAF > 6%                                                                                           |
| Yoo 2014               | AITL      | Frozen lymph node tumour biopsy                                               | Buffy coat                                                                                       | SureSelect Human All Exon V3 kit                        | 92.5x                                                                 | MuTect 1.1.4 and Strelka 1.0.7               | (i) $\leq 1$ read with the alternate allele in normal (ii) tumour VAF:normal VAF > 5 (iii) $\leq 2$ reads for the third allele |

**Supplementary Table 2:** Key experimental and bioinformatic parameters of the studies included in this meta-analysis.

|                        | <b>Disease</b>           | <b>Number of patients</b> | <b>Percentage treatment naïve at time of sampling</b> |
|------------------------|--------------------------|---------------------------|-------------------------------------------------------|
| Choi 2015              | SS                       | 33                        | 8%                                                    |
| da Silva Almeida 2015  | MF/SS                    | 34                        | Not specified                                         |
| Jiang 2015             | NKTCL                    | 25                        | 100%                                                  |
| Kataoka 2015           | ATLL                     | 81                        | 98%                                                   |
| McKinney 2017          | HSTL                     | 64                        | Not specified                                         |
| Moffitt 2017           | EATL                     | 58                        | Not specified                                         |
| Palomero 2014          | AITL/EATL/<br>NKTCL/PTCL | 12                        | Not specified                                         |
| Prasad 2016            | SS                       | 12                        | 8%                                                    |
| Roberti 2016           | EATL                     | 15                        | Not specified                                         |
| Sakata-Yanagimoto 2014 | AITL/PTCL                | 6                         | Not specified                                         |
| Ungewickell 2015       | MF/SS                    | 11                        | Not specified                                         |
| Wang 2015              | SS                       | 37                        | 65%                                                   |
| Woollard 2016          | SS                       | 10                        | 100%                                                  |
| Yoo 2014               | AITL                     | 5                         | 0%                                                    |

**Supplementary Table 3:** Treatment status of patients included in this meta-analysis.

## Supplementary References

1. Dobin, A. *et al.* STAR: ultrafast universal RNA-seq aligner. *Bioinforma. Oxf. Engl.* **29**, 15–21 (2013).
2. McKenna, A. *et al.* The Genome Analysis Toolkit: A MapReduce framework for analyzing next-generation DNA sequencing data. *Genome Res.* **20**, 1297–1303 (2010).
3. Obenchain, V. *et al.* VariantAnnotation : a Bioconductor package for exploration and annotation of genetic variants. *Bioinformatics* **30**, 2076–2078 (2014).
4. R Core Team (2017). *R: A Language and Environment for Statistical Computing*. (R Foundation for Statistical Computing, Vienna, Austria. URL <https://www.R-project.org/>).
5. Poirion, O., Zhu, X., Ching, T. & Garmire, L. X. Using single nucleotide variations in single-cell RNA-seq to identify subpopulations and genotype-phenotype linkage. *Nat. Commun.* **9**, 4892 (2018).
6. Gehring, J. S., Fischer, B., Lawrence, M. & Huber, W. SomaticSignatures: inferring mutational signatures from single-nucleotide variants. *Bioinforma. Oxf. Engl.* **31**, 3673–3675 (2015).
